# Supplementary material
Source: Springer Nature journal article supplement (https://www.springermedizin.de/resource/supplementary/12889_2010_3109_MOESM4_ESM.pdf/9488148)

**Fig. 2.** *The process of Analysis*

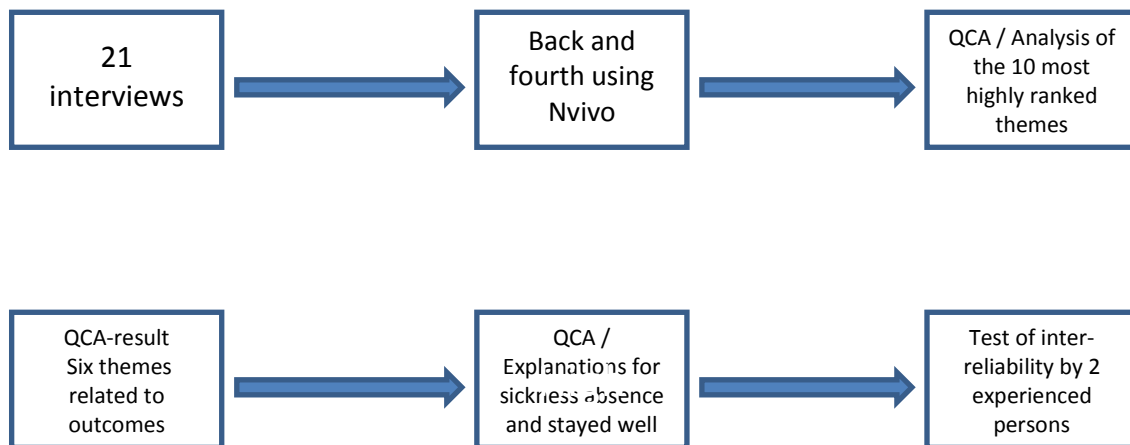

Supplement: MOESM4 [file 9488148]
